# Supplementary material
Source: HighWire-hosted journal article supplement (https://openres.ersjournals.com/content/9/2/00618-2022)
Supplement: inline-supplementary-material-1 [file inline-supplementary-material-1.pdf]

## **ONLINE SUPPLEMENT**

### **Registry on the treatment of central and complex sleep-disordered breathing with adaptive servo-ventilation (READ-ASV): study protocol and cohort profile**

Michael Arzt<sup>1</sup>, Oliver Munt<sup>2</sup>, Jean-Louis Pépin<sup>3</sup>, Raphael Heinzer<sup>4</sup>, Raphaela Kübeck<sup>5</sup>, Daniela Ehram-Tosi<sup>6</sup>, Adam Benjafield<sup>7</sup>, Holger Woehrle<sup>8</sup> for the READ-ASV investigators

<sup>1</sup>Department of Internal Medicine II, University Hospital Regensburg, Regensburg, Germany

<sup>2</sup>ResMed Science Centre, Martinsried, Germany

<sup>3</sup>Pôle Thorax et Vaisseaux, Centre Hospitalier Universitaire Grenoble Alpes, Grenoble, France

<sup>4</sup>Centre d'Investigation et de Recherche sur le Sommeil, Centre Hospitalier Universitaire Vaudois (CHUV), Lausanne, Switzerland

<sup>5</sup>The Clinical Research Institute, Munich, Germany

<sup>6</sup>ResMed Science Centre, Basel, Switzerland

<sup>7</sup>ResMed Science Center, Sydney, NSW, Australia

<sup>8</sup>Sleep and Ventilation Center Blaubeuren, Ulm, Germany

## **READ-ASV Registry Steering Committee**

Michael Arzt (Germany), Holger Woehrle (Germany), Jean-Louis Pepin (France), Raphael Heinzer (Switzerland), Adam Benjafield (Australia)

## **Study Statistician**

Ulrike von Hehn (Germany)

## **Study Data Management**

CRI – The Clinical Research Institute (Germany)

## **Study Centers and Investigators**

| <b>Site</b>                                   | <b>Investigator(s)</b>                      | <b>City</b>   | <b>Country</b> |
|-----------------------------------------------|---------------------------------------------|---------------|----------------|
| Universitätsklinikum<br>Regensburg            | Prof. Dr Michael Arzt                       | Regensburg    | Germany        |
| Schlaf- und<br>Beatmungszentrum<br>Blaubeuren | Holger Woehrle                              | Blaubeuren    | Germany        |
| Hospitalverbund Klinikum<br>Kempten           | Prof Dr Christian Schumann                  | Kempten       | Germany        |
| Universitätsklinikum<br>Heidelberg            | Dr Andreas Benz, Dr Mavi<br>Schellenberg    | Heidelberg    | Germany        |
| Klinikum Nürnberg                             | Dr Dora Trichè                              | Nürnberg      | Germany        |
| Praxis Dr Stolpe                              | Dr Christoph Stolpe                         | Ibbenbüren    | Germany        |
| Universitätsklinikum<br>Schleswig-Holstein    | Dr Armin Steffen, Dr Markus Daerr           | Lübeck        | Germany        |
| Praxisnetz Westfalen<br>(Waltert/Esselmann)   | Dr Matthias Waltert, Dr Albert<br>Esselmann | Warendorf     | Germany        |
| Fachkrankenhaus Kloster<br>Grafschaft         | Dr Dominic Dellweg, Dr Jens Kerl            | Schmallenberg | Germany        |

|                                                    |                                                  |                 |                 |
|----------------------------------------------------|--------------------------------------------------|-----------------|-----------------|
| Christophorus-Kliniken<br>Dülmen                   | Dr Matthias Weinrich                             | Dülmen          | Germany         |
| Karl-Hansen-Klinik                                 | Dr Dieter Specht                                 | Bad Lippspringe | Germany         |
| Marienkrankenhaus Soest                            | Dr Matthias Elbers, Dr Volker<br>Trueten         | Soest           | Germany         |
| Evangelisches Krankenhaus<br>Herne-Eickel          | Dr Martina Neddermann                            | Herne           | Germany         |
| Universitätsmedizin<br>Ruhrlandklinik Essen        | Prof. Dr Christoph Schoebel                      | Essen           | Germany         |
| Klinikum Landshut                                  | Dr Reinhard Zimmermann, Dr Elena<br>Riu-Torrente | Landshut        | Germany         |
| Lungenklinik Hemer                                 | Dr Michael Westhoff                              | Hemer           | Germany         |
| Praxis für Lunge, Herz und<br>Schlaf Bielefeld     | Dr Markus Gernhold                               | Bielefeld       | Germany         |
| Klinikum Karlsruhe                                 | Dr Matthias Berger                               | Karlsruhe       | Germany         |
| Klinik für Schlafmedizin<br>Grand Arc Düsseldorf   | Dr Hartmut Grueger                               | Düsseldorf      | Germany         |
| Odense Universitetshospital                        | Prof. Dr Michael Sprehn                          | Odense          | Denmark         |
| Sjællands<br>Universitetshospital                  | Prof. Dr Preben Homøe, Dr Lisbeth<br>Jensen      | Køge            | Denmark         |
| University Hospital of<br>Lausanne                 | Prof. Dr Raphael Heinzer                         | Lausanne        | Switzerla<br>nd |
| Inselspital Bern                                   | Dr Anne-Katrin Brill                             | Bern            | Switzerla<br>nd |
| University Hospital de Santa<br>Maria              | Prof. Dr Paula Pinto                             | Lisboa          | Portugal        |
| Hospital Sao Joao                                  | Prof. Dr Marta Drummond                          | Porto           | Portugal        |
| Hospital Clinic                                    | Dr Cristina Embid                                | Barcelona       | Spain           |
| Hospital de Cruces                                 | Dr Valentin Cabriada                             | Baracaldo       | Spain           |
| Hospital General de Asturias                       | Dr Gemma Rubinos                                 | Oviedo          | Spain           |
| Centre Hospitalier<br>Universitaire Grenoble Alpes | Prof. Dr Renaud Tamisier                         | Grenoble        | France          |

**Figure S1.** Proportion of patients (overall and by indication subgroup) who had a Pittsburgh Sleep Quality Index (PSQI) score >5 (based on 374 patients with available data). CSA, central sleep apnoea; CSA-CVD, central sleep apnoea in cardiovascular disease; OSA, obstructive sleep apnoea; TE-CSA, treatment-emergent or persistent central sleep apnoea. The circles at the bottom of the columns indicate the size of the respective subgroup (n=number).

**Figure S2.** EuroQol-5-Dimension Scale (EQ-5D) index (**A**) and visual analogue scale (VAS) scores (**B**), overall and by indication subgroup. Higher VAS scores indicate better quality of life.

**Table S1.** Polygraphy/polysomnography findings for the study population by patient sex

| Parameter | Females    | Males       | p-value |
|-----------|------------|-------------|---------|
| AHI, /h   | 48±24 (99) | 49±22 (595) | 0.271   |
| CAI, /h   | 11±16 (78) | 14±14 (498) | <0.001  |
| OAI, /h   | 16±16 (88) | 15±16 (503) | 0.482   |
| MAI, /h   | 7±10 (51)  | 9±11 (383)  | 0.098   |
| HI, /h    | 21±15 (98) | 19±14 (565) | 0.075   |

Values are mean ± standard deviation (number of patients with data).

AHI, apnoea-hypopnoea index; CAI, central apnoea index; HI, hypopnoea index; MAI, mixed apnoea index; OAI, obstructive apnoea index.

**Table S2.** Quality of life and symptom burden for the study population by patient sex

| Parameter                                | Females         | Males           | p-value |
|------------------------------------------|-----------------|-----------------|---------|
| FOSQ score                               | 15.3±3.8 (102)  | 16.9±2.8 (654)  | <0.001  |
| ESS score                                | 9.8±6.1 (98)    | 8.7±4.8 (622)   | 0.138   |
| PSQI score                               | 10.9±4.0 (40)   | 8.1±4.0 (293)   | <0.001  |
| EQ-5D index                              | 0.60±0.33 (66)  | 0.81±0.22 (472) | <0.001  |
| EQ-5D health today, VAS score            | 53.8±19.2 (102) | 63.8±19.0 (638) | <0.001  |
| FOSQ score <17.9 or ESS score >10, n (%) | 103 (74%)       | 633 (60%)       | 0.008   |
| Sleep onset latency                      | 36±35 (48)      | 25±33 (315)     | 0.006   |

Values are mean ± standard deviation (number of patients with data), or number of patients (%).

EQ-5D, EuroQol-5-Dimension Scale; ESS, Epworth Sleepiness Scale; FOSQ, Functional Outcomes of Sleep Questionnaire; PSQI, Pittsburg Sleep Quality Index; VAS, visual analogue scale.
